# Supplementary material
Source: PubMed Central journal article supplement (PMC3470904)
Supplement: NIHMS408502-supplement-supp.pdf [file NIHMS408502-supplement-supp.pdf]

# SUPPLEMENTARY INFORMATION FOR

## Translation of DNA Signals into Polymer Assembly Instructions

Shiping Liao & Nadrian C. Seeman\*

Department of Chemistry

New York University,  
New York, NY 10003, USA.

### CONTENTS:

|                      |      |
|----------------------|------|
| EXPERIMENTAL METHODS | 1-3  |
| STRAND SEQUENCES     | 6-14 |

### Experimental Methods

This section contains experimental details for procedures that are standard (S1), but which have been modified slightly in the work described here.

*Device Assembly.* The strands were designed using the program *SEQUIN* (S2). The component strands of diamonds I, II, III, IV and V (Figure 1b) were dissolved separately to a concentration of 1  $\mu\text{M}$  in a solution containing 40 mM Tris, pH 8.0, 20 mM acetic acid, 2 mM EDTA and 12.5 mM magnesium acetate (TAEMg), and the mixtures were heated to 90 °C and cooled slowly to 4 °C. Diamonds II and III were then combined, as were diamonds IV and V; these mixtures were heated to 48 °C and cooled slowly to 4 °C. In the following, diamond I is termed U1, complex II+III is termed U2 and complex IV+V is termed

U3. The component strands of PX1, PX2, DX1, DX2, DX3, DX4, DX5, DX6, DX7, DS1, and DS2 (Figure 1c) were dissolved separately to a concentration of 2  $\mu$ M in the same solution. These mixtures were heated to 90 °C (5 min), and cooled as follows: 65 °C (30 min), 45 °C (30 min), 37 °C (30 min), 4 °C (30 min). U1, PX1, U2, PX2, and U3 were combined, heated to 40 °C and cooled slowly to 4 °C.

*Setting the Device State.* Unset strands were added to the solution and the solution was kept at 20 °C 3 hours; the solution was treated with streptavidin beads at 20 °C for 30 minutes to remove the set-strand/unset-strand duplexes. At this point the set strands for the target JX<sub>2</sub> or PX states were added to the solution and kept at 20 °C for 3 hours to establish the device conformation.

*Preparing and Purifying the Assembly Complex.* DS1 and DX complexes 1-7 were added to the solution. The mixture was heated with the following thermo-cycling protocol: 35 °C (10 min), 33 °C (10 min), 30 °C (10 min), 25 °C (10 min), 20 °C (10 min) for 15 cycles. The solution was treated with magnetic streptavidin beads at 20 °C 30 minutes to bind devices with an intact left-hand side; failed assemblies are washed away and the solution containing the beads is replaced with a new solution containing 40 mM Tris, pH 8.0, 20 mM acetic acid, 2 mM EDTA, 12.5 mM magnesium acetate, 50 mM potassium acetate and 1 mM DTT. Ten units of Sma I (NEB) were added and the solution was incubated at 20 °C for 1 hour to release the target assembly, and the beads then removed from the solution. DS2 was then added, and the solution was incubated at 20 °C for 2 hr, followed by magnetic streptavidin bead treatment at 20 °C for 30 minutes only those with an intact right-hand side should be bound. The solution was replaced with a new solution containing 40 mM Tris, pH 8.0, 20 mM acetic acid, 2 mM EDTA, 12.5 mM magnesium acetate, 50 mM potassium acetate and 1 mM DTT.

Ten units of Apa I (NEB) were added, and the solution was incubated at 20 °C for 1 hour and the magnetic beads were removed.

*Ligation and Analysis.* The solution was brought to 1 mM in ATP and 10 units of T4 polynucleotide ligase (USB) were added. The ligation proceeded at 16 °C for 16 hours. Following ligation, the solution was heated at 90 °C for 5 minutes, and the ligation products were purified using 6% denaturing PAGE. The ligation products were sequenced to establish the correct assembly. A few missed or unknown bases are noted in the experimental sequencing, but these are far from the ligation points, and likely represent errors in the sequencing procedure.

## REFERENCES

- S1. N.C. Seeman, *Current Protocols in Nucleic Acid Chemistry*, Unit 12.1, John Wiley & Sons, New York (2002).
- S2. N.C. Seeman, *J. Biomol. Struct. & Dyns.* **8**, 573 (1990).

## LEGEND TO FIGURES S1-S3

The components used in this work are shown and the strand numbering is indicated. The coloring is used to aid the eye in distinguishing all strands, and has no further significance. Strands used twice in the same physical unit are labeled with an asterisk.

## LEGEND TO FIGS. S4-S7.

These figures show the sequencing traces of the complements to the products in device states PX-PX, PX-JX<sub>2</sub>, JX<sub>2</sub>-PX and JX<sub>2</sub>-JX<sub>2</sub>, respectively.

## The Sequences of the DNA Strands Used Here (See Figs. S1-S3 for Numbering).

Strand 1:

5'.GATCGGTGCTCATGTGTATGGACGCTACGGGACCGCAGTACGGCACGTTGCTAT  
CGCTCAATGC.3'

Strand 2(2\*):

5'.GTA CTAGCAGTTTTTTTCGCGGT CACACCGTACAGCATT TTTTGTGCATGGCACCG  
TGCACATGGTCGTCG.3'

Strand 3(3\*):

5'.CGTCGTATCTGACGCATGGGACGATGATGGACCTACGATCCGTAGATTGGACTG  
TTGACCTGTGACCGCGCTGCTAGTACGTCTGTCATC.3'

Strand 4(4\*):

5'.GAGATCGCCGAGCGCCGTCACCCATGCGTCTTTTTTAGATACGACGGATGACAG  
AC.3'

Strand 5(5\*):

5'.AACGTGGTCAACAGTGGTGC.3'

Strand 6(6\*):

5'.ATCGTGGCATTACCACCATC.3'

Strand 7:

5'.GTCCAGACGGTAGTCTGCTTCAGCCTGGTAATGCCTGACGGCGCTCGGCGATCT  
CCGTT.3'

Strand 8(8\*):

5'.GTGCCGCGCATTTTTTAGTTGGCTCACCAATCTACGTTTTTTGATCGTAGGTGGC  
TGAAGCAGACTACCGTCTGGAC.3'

Strand 9:

5'.CTACACCCGTAGCGTGGCGT.3'

Strand 10(10\*):

5'.GACAATGACGGGCAGTATCCTGTAGACGCCTGCCATGCACTGCTGTACGGACGT  
TGCACCTGAGCCAACTTGCGCGGCACGGATGTGCGC.3'

Strand 11:

5'.GATCCACGTGCAGCTATGCGGTGGATACTGCCTTTTTTCGTCATTGTGCGGCACA  
TCC.3'

Strand 12:

5'.GTCATAGTTCAGTGTACGAACGACTGCGTACACGGACAGCGCAGGACTGTCTA  
GCTCCAGTGGGATC.3'

Strand 13:

5'.CTACACCTGCGCTGTGGCGT.3'

Strand 14:

5'.TAGCACACTGGCGTACGACAGTGGATACTGCCTTTTTTCGTCATTGTCGCGCACA  
TCC.3'

Strand 15:

5'.GACCAGACGGTAGTCTGCTTCAGCCTGGTAATGCCTGACGGCGCTCGGCGATCT  
CTAGGC.3'

Strand 16:

5'.GTACTAGCAGTTTTTTTCGCGGTACACCGTACAGCATTTTTTGTGCATGGCACCG  
ACTATGTCGATC.3'

Strand 17:

5'.GTAACATGATTAGCGGATCGACATAGTCGGACAGCGCAGGACACGCTGGCTACC  
ATACATCAGTCAGTGTTTCG.3'

Strand 18:

5'.GTATGGTAGCCAGCGTGTGGATACTGCCTTTTTTCGTCATTGTCGCGCACATCC.3  
,

Strand 19:

5'.GAGTCGACGGTAGTCTGCTTCAGCCTGGTAATGCCTGACGGCGCTCGGCGATCT  
CCGACC.3'

Strand 20:

5'.GATCGGTGCTCATGTGTATGGACGCTACGGGACCGCAGTACGGCACGTTGCTAT  
CGCTTATGTCTCGAATC.3'

Strand 21:

5'.GACGGTAGTCTGCTTCAGCCTGGTAATGCCTGACGGCGCTCGGCGATCTCCGAA  
G.3'

Strand 22:

5'.GACACGCATCAGTGTCACGAACGACTGCGTACACGGACAGCGCAGGACTGTCTA  
GCTCCAGTGGGATC.3'

Strand 23:

5'.GACGGTAGTCTGCTTCAGCCTGGTAATGCCTGACGGCGCTCGGCGATCTCGAAT  
G.3'

Strand 24:

5'.AGCGCATTACTGCCCACGTAGTCTTCGATAACCTGTAAGTATCGCGTGGTCGGTA  
CTTTTGTACCTACACCGCGATCCAGA.3'

Strand 25:

5'.GTCGTGCAGTATGGTATTTTTACCAGTCAGGACGACCGTGCGACGCCCTCACAT  
CTGGCAACGAGTGTACG.3'

Strand 26:

5'.CGTGGCCTGACATGCGCTCGAACACTGACTGAT.3'

Strand 27:

5'.ATCACTATGACGATTCGGACCATCGTTGACTTA.3'

Strand 28:

5'.CAGGTTGGCGTAGACTAATCAGCAC.3'

Strand 29:

5'.GCTAACTGTGTGAGATCGACGCACG.3'

Strand 30:

5'.CAGGTTATCGAAGACTAGCATGAGC.3'

Strand 31:

5'.AGCCGTA CTGTGAGGGCGTCGCACG.3'

Strand 32:

5'.TATTACTGCCCACGGACGGCTCGATTACCTGTAAGTGTGCGTGGTCGGTACTTT  
TGTACCTACACCGCGACTTCGA.3'

Strand 33:

5'.GTCGTGCAGTATGGTATTTTTACCACACAGAACGACCGTGCGCTGCCACTACATC  
GAACAACGAGTGTACG.3'

Strand 34:

5'.CGTGGTCTGTGATAACTTGCATTGAGCGA.3'

Strand 35:

5'.ATCTGCGTGTGTCAGTTCGGACCATCGTTGACTTA.3'

Strand 36:

5'.CAGGTAGGCAGGCCGTCGCCAGACT.3'

Strand 37:

5'.TCGTAGCTTGTAGTATCGACGCACG.3'

Strand 38:

5'.CAGGTAATCGAGCCGTCGGTACTGG.3'

Strand 39:

5'.GGCCAAGTTGTAGTGGCAGCGCACG.3'

Unset Strand for Strand 28:

Biotin.5'.GTGCTGATTAGTCTACGCCAACCTG.3'

Unset Strand for Strand 29:

Biotin.5'.CGTGCGTCGATCTCACACAGTTAGC.3'

Unset Strand for Strand 30:

Biotin.5'.GTCATGCTAGTCTTCGATAACCTG.3'

Unset Strand for Strand 31:

Biotin.5'.CGTGCGACGCCCTCACAGTACGGCT.3'

Unset Strand for Strand 36:

Biotin.5'.AGTCTGGCGACGGCCTGCCTACCTG.3'

Unset Strand for Strand 37:

Biotin.5'.CGTGCGTCGATACTACAAGCTACGA.3'

Unset Strand for Strand 38:

Biotin.5'.CCAGTACCGACGGCTCGATTACCTG.3'

Unset Strand for Strand 39:

Biotin.5'.CGTGCGCTGCCACTACAACCTTGGCC.3'

Strand 40:

5'.GTAGTCGATGTACCACCATGCAGTCTTTTACTGTCATGGACAGCGCAGGACGAT  
CAGCCAAGCTACGGTCG.3'

Strand 41:

5'.CTACACCTGCGCTGTGGCGT.3'

Strand 42:

5'.GTAGCTTGGCTGATCGTGGGCCTATACGCACGTACTGACGGCTATCACGCGGTA  
TGCCATCATG.3'

Strand 43:

5'.PO<sub>4</sub>.CATGATGGCATAACCGCGTGATAGCCGTCAGTACGTGCGTATAGGCCCTGTA  
GACGCCTGGTACATCGACTAC.3'

Strand 44:

5'.GCACGAACAGTAGATGCGCTAAGCAGATTGCACACATAGTTGCGTCACCGATCA  
TCCAGTCGTC.3'

Strand 45:

5'.GACTCGACGACTGGATGATCGGACAGCCGTCTAGCTGGCCGCTTGTCGCGTTAC  
CGTATGCAGGACGTACATCGCACCACTGCCTA.3'

Strand 46:

5'.AGCGGCCAGCTAGACGGCTGTGGCGTAGCCATGCTATCACGCTGATGGTCGGC  
ATTGACTACACCTGCATACGGTAACGCGA  
CA.3'

Strand 47:

5'.AGTGGTGCGATGTACGTGGGCACTCATTACTTGGCAAGGTACTAGGTCCATTCC  
CTCAGTTATC.3'

Strand 48:



5'.PO<sub>4</sub>.GATAACTGAGCGAATGGACCTAGTACCTTGCCAAGTAATGAGTGCCCTGTAG  
TCAATGCCGACCATCAGCGTGATAGCATGGCTACGCCTGACGCAACTATGTGTGCA  
ATCTGCTTAGCGCATCTACTGTTCGTGC.3'

Strand 49:5'.

GCACGAACAGTAGATGCGCGGAGCAGTGATGGTCGGCATTGACTACACCGATCAT  
CCAGTCGTC.3'

Strand 50:

5'.GACTCGACGACTGGATGATCGGACAGCCGTCTAGCTGGCCTATTGTGCGGTTAC  
CGTATGCAGGACGTACATCGCCGGATTAAGCG.3'

Strand 51:

5'.ATAGGCCAGCTAGACGGCTGTGGGCACTCATTACTTGGCAAGATTGCACACATA  
GTTGCGTCACCTGCATACGGTAACGCGACA.3'

Strand 52:

5'.AATCCGGCGATGTACGTGGCGTAGCCATGCTATCGTTGGTACTAGGTCCATTCCG  
CTCAGTTATC.3'

Strand 53:

5'.PO<sub>4</sub>.GATAACTGAGCGAATGGACCTAGTACCAACGATAGCATGGCTACGCCTGAC  
GCAACTATGTGTGCAATCTTGCCAAGTAATGAGTGCCCTGTAGTCAATGCCGACCA  
TCACTGCTCCGCGCATCTACTGTTCGTGC.3'

Strand 54:

5'.GCACGAACAGTAGATGCGCGGAGCAGTGATAAGCGGCAGACACTACACCGATCA  
TCCAGTCAAC.3'

Strand 55:

5'.PO<sub>4</sub>.TGTTAGCGCCTGACGCAACTATGTGTGCAATCTTGCCAAGTAATTGGTGCCC  
TGTAGTGTCTGCCGCTTATCACTGCTCCGCGCATCTACTGTTCGTGC.3'

Strand 56:

5'.TGGTCGTTGACTGGATGATCGGACAGCCGTCTAGCTGGCCTATTGTGCGGTTAC  
CGTATGCAGGACGTACATCGCCGGATTCATTC.3'

Strand 57:

5'.ATAGGCCAGCTAGACGGCTGTGGGCACCAATTACTTGGCAAGATTGCACACATA  
GTTGCGTCACCTGCATACGGTAACGCGACA.3'

Strand 58:

5'.AATCCGGCGATGTACGTGGCGCTAACA.3'

Strand 59:

5'.GCACGAACAGTAGATGCGCTAAGCAGATTGCACACATAGTTGCGTCACCGATCA  
TCCGTTGAAC.3'

Strand 60:

5'.PO<sub>4</sub>.ATGAGTGCCCTGTAGTCAATGCCGAGCCTCAGCGTGATAGCATGGCTACGC  
CTGACGCAACTATGTGTGCAATCTGCTTAGCGCATCTACTGTTTCGTGC.3'

Strand 61:

5'.TGGTCGTTCAACGGATGATCGGACAGCCGTCTAGCTGGCCGCTTGTCGCGTTAC  
CGTATGCAGGACGTACATCGCACCAGACTCG.3'

Strand 62:

5'.AGCGGCCAGCTAGACGGCTGTGGCGTAGCCATGCTATCACGCTGAGGCTCGGC  
ATTGACTACACCTGCATACGGTAACGCGACA.3'

Strand 63:

5'.TCTGGTGCGATGTACGTGGGCACTCAT.3'

Strand 64:

5'.GCACACATGAGCACGATATTAGCGCAGCGTGAGTCATAGTTGCGTCACCGATCA  
TCAGCATCCA.3'

Strand 65:

5'.PO<sub>4</sub>.GAATCGACCCTGTAGTGCAATCTACTGCTATACTTGACCGCATGGCTACGCC  
TGACGCAACTATGACTCACGCTGCGCTAATATCGTGCTCATGTGTGC.3'

Strand 66:

5'.TGGACTGGATGCTGATGATCGGACAGCCGTCTAGCTGGCCGCTTGTCGCGTTAC  
CGTATGCAGGACGTACATCGCACCAGACATTC.3'

Strand 67:

5'.AGCGGCCAGCTAGACGGCTGTGGCGTAGCCATGCGGTCAAGTATAGCAGTAGAT  
TGCACTACACCTGCATACGGTAACGCGACA.3'

Strand 68:

5'.TCTGGTGCGATGTACGTGGGTCGATTC.3'

Strand 69:

5'.GCACAATGCGGGTGGATAATGTGAGTGATATGACCATAGTTGCGTCACCGATCAT  
CCGGCATCA.3'

Strand 70:

5'.PO<sub>4</sub>.GAGCGTGCCCTGTAGTACCACTGCCAACAGAGGTGATAGCATGGCTACGC  
CTGACGCAACTATGGTCATATCACTCACATTATCCACCCGCATTGTGC.3'

Strand 71:

5'.TGGACTGATGCCGGATGATCGGACAGCCGTCTAGCTGGCCGCTTGTCGCGTTAC  
CGTATGCAGGACGTACATCGCACCACTTCG.3'

Strand 72:

5'.AGCGGCCAGCTAGACGGCTGTGGCGTAGCCATGCTATCGACCTCTGTTGGCAGT  
GGTACTACACCTGCATACGGTAACGCGACA.3'

Strand 73:

5'.TCTGGTGCGATGTACGTGGGCACGCTC.3'

Strand 74:

5'.CGACTCACGTA CTGCACTACGATCACCCGGGATCGCACCGTCTTT.Biotin.TTT.Bio  
tin.TGACGGTGCGATCCCGGGTGATCGTAGT.3'

Strand 75:

5'.CGCTAATCATGTTACCAGCTATCTACATCGACCGCTCAGCCTGTGTGATGCTGTC  
AGTCACCATACGCTGCTAGTCCACTGTAC.3'

Strand 76:

5'.GCAGTACGTGAGTCGGTACAGTGGACTAGCAGCGTATGGTGTGACAGCATCACA  
CAGGCTGAGCGGTCGATGTAGATAGCTG.3'

Strand 77:

5'.ACGTTGGATTGGGCCCTGATCGTAGTGTTT.Biotin.TTT.Biotin.TCACTACGATCAG  
GGCCAATCCAACGTCGCTAATCATGTTAC.3'

Strand 78:

5'.GTACAGTGGACTAGCAGCGTATGGTACTGACAGCATCACACAGGCTGAGCGGT  
CGATGTAGATAGCTGGTAACATGATTAGCG.3'

Strand 79:

5'.CAGCTATCTACATCGACCGCTCAGCCTGTGTGATGCTGTCAGTCACCATACGCTG  
CTAGTCCACTGTACGATTTCGAGACATAAG.3'

Experimental Sequences of Ligation Products:

PX1-PX2:

5'.TGTTAGCGCCTGACGCAACTATGTGTGCAATCTTGCCAAGTAATTGGTGCCCTGT  
AGTGTCTGCCGCTTATCACTGCTCCGCGCATCTACTGTTTCGTGCGATAACTGAGCG  
AATGGACCTAGTACCTTGCCAAGTAATGAGTGCCCTGTAGTCAATGCCGACCATCA  
GCGTGATAGCATGGCTACGCCTGACGCAACTATGTGTGCAATCTGCTTAGCGCATC  
TACTGTTTCGTGCCATGATGGCATAACCGCGTGATAGCCGTCAGTACGTGCGTATAGG  
CCCTGTAGACGCCTGGTACATCGACTAC.3'

PX1-JX<sub>2</sub>:

5'.ATGAGTGCCCTGTAGTCAATGCCGAGCCTCAGCGTGATAGCATGGCTACGCCTG  
ACGCAACTATGTGTGCAATCTGCTTAGCGCATCTACTGTTTCGTGCGATAACTGAGC  
GAATGGACCTAGTACCTTGCCAAGTAATGAGTGCCCTGTAGTCAATGCCGACCATC  
AGCGTGATAGCATGGCTACGCCTGACGCAACTATGTGTGCAATCTGCTTAGCGCAT  
CTACTGTTTCGTGCCATGATGGCATAACCGCGTGATAGCCGTCAGTACGTGCGTATAG  
GCCCTGTAGACGCCTGGTACATCGACTAC.3'

JX<sub>2</sub>1-PX2:

5'.GAGCGTGCCCTGTAGTACCACTGCCAACAGAGGTCGATAGCATGGCTACGCCTG  
ACGCAACTATGGTCATATCACTCACATTATCCACCCGCATTGTGCGATAACTGAGC  
GAATGGACCTAGTACCAACGATAGCATGGCTACGCCTGACGCAACTATGTGTGCAA  
TCTTGCCAAGTAATGAGTGCCCTGTAGTCAATGCCGACCATCACTGCTCCGCGCAT  
CTACTGTTTCGTGCATGATGGCATAACCGCGTGATAGCCGTCAGTACGTGCGTATAGG  
CCCTGTAGACGCCTGGTACATCGACTAC.3'

JX<sub>2</sub>1-JX<sub>2</sub>:

5'.GAATCGACCCTGTAGTGCAATCTACTGCTATACTTGACCGCATGGCTACGCCTGA  
CGCAACTATGACTCACGCTGCGCTAATATCGTGCTCATGTGTGCGATAACTGAGCG  
AATGGACCTAGTACCAACGATAGCATGGCTACGCCTGACGCAACTATGTGTGCAAT  
CTTGCCAAGTAATGAGTGCCCTGTAGTCAATGCCGACCATCACTGCTCCGCGCATC  
TACTGTTTCGTGCCATGATGGCATAACCGCGTGATAGCCGTCAGTACGTGCGTATAGG  
CCCTGTAGACGCCTGGTACATCGACTAC.3'

# Strand Numbering for Diamond Components

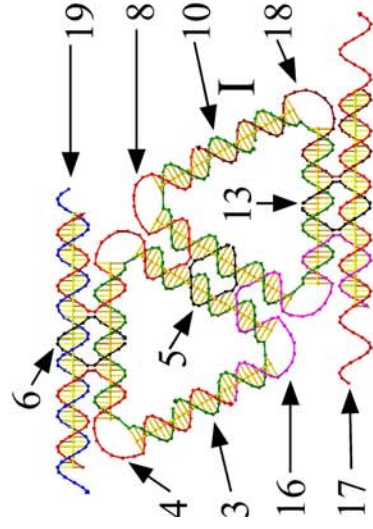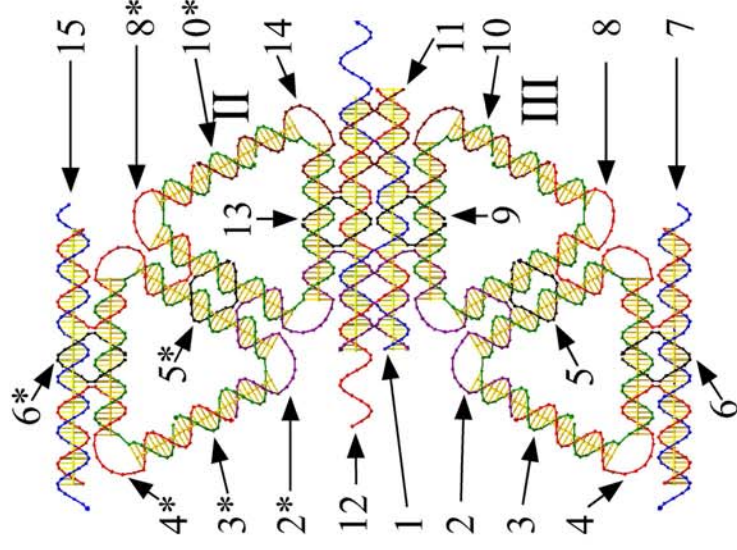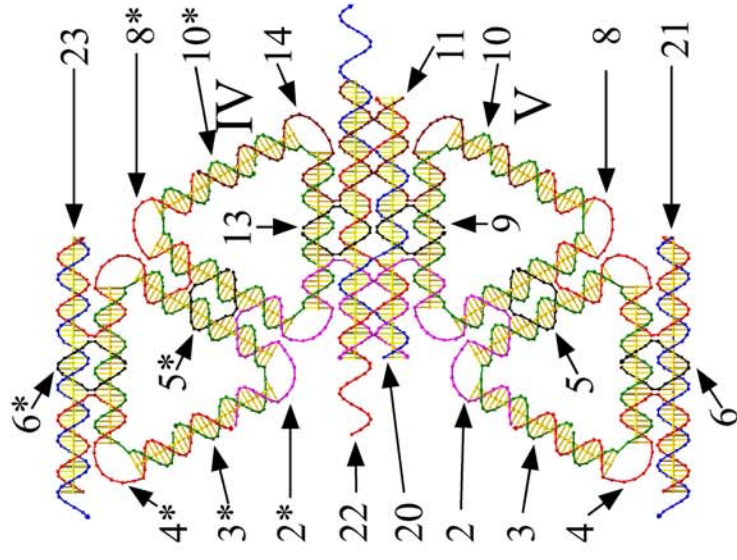

# Strand Numbering for DX and DS Components

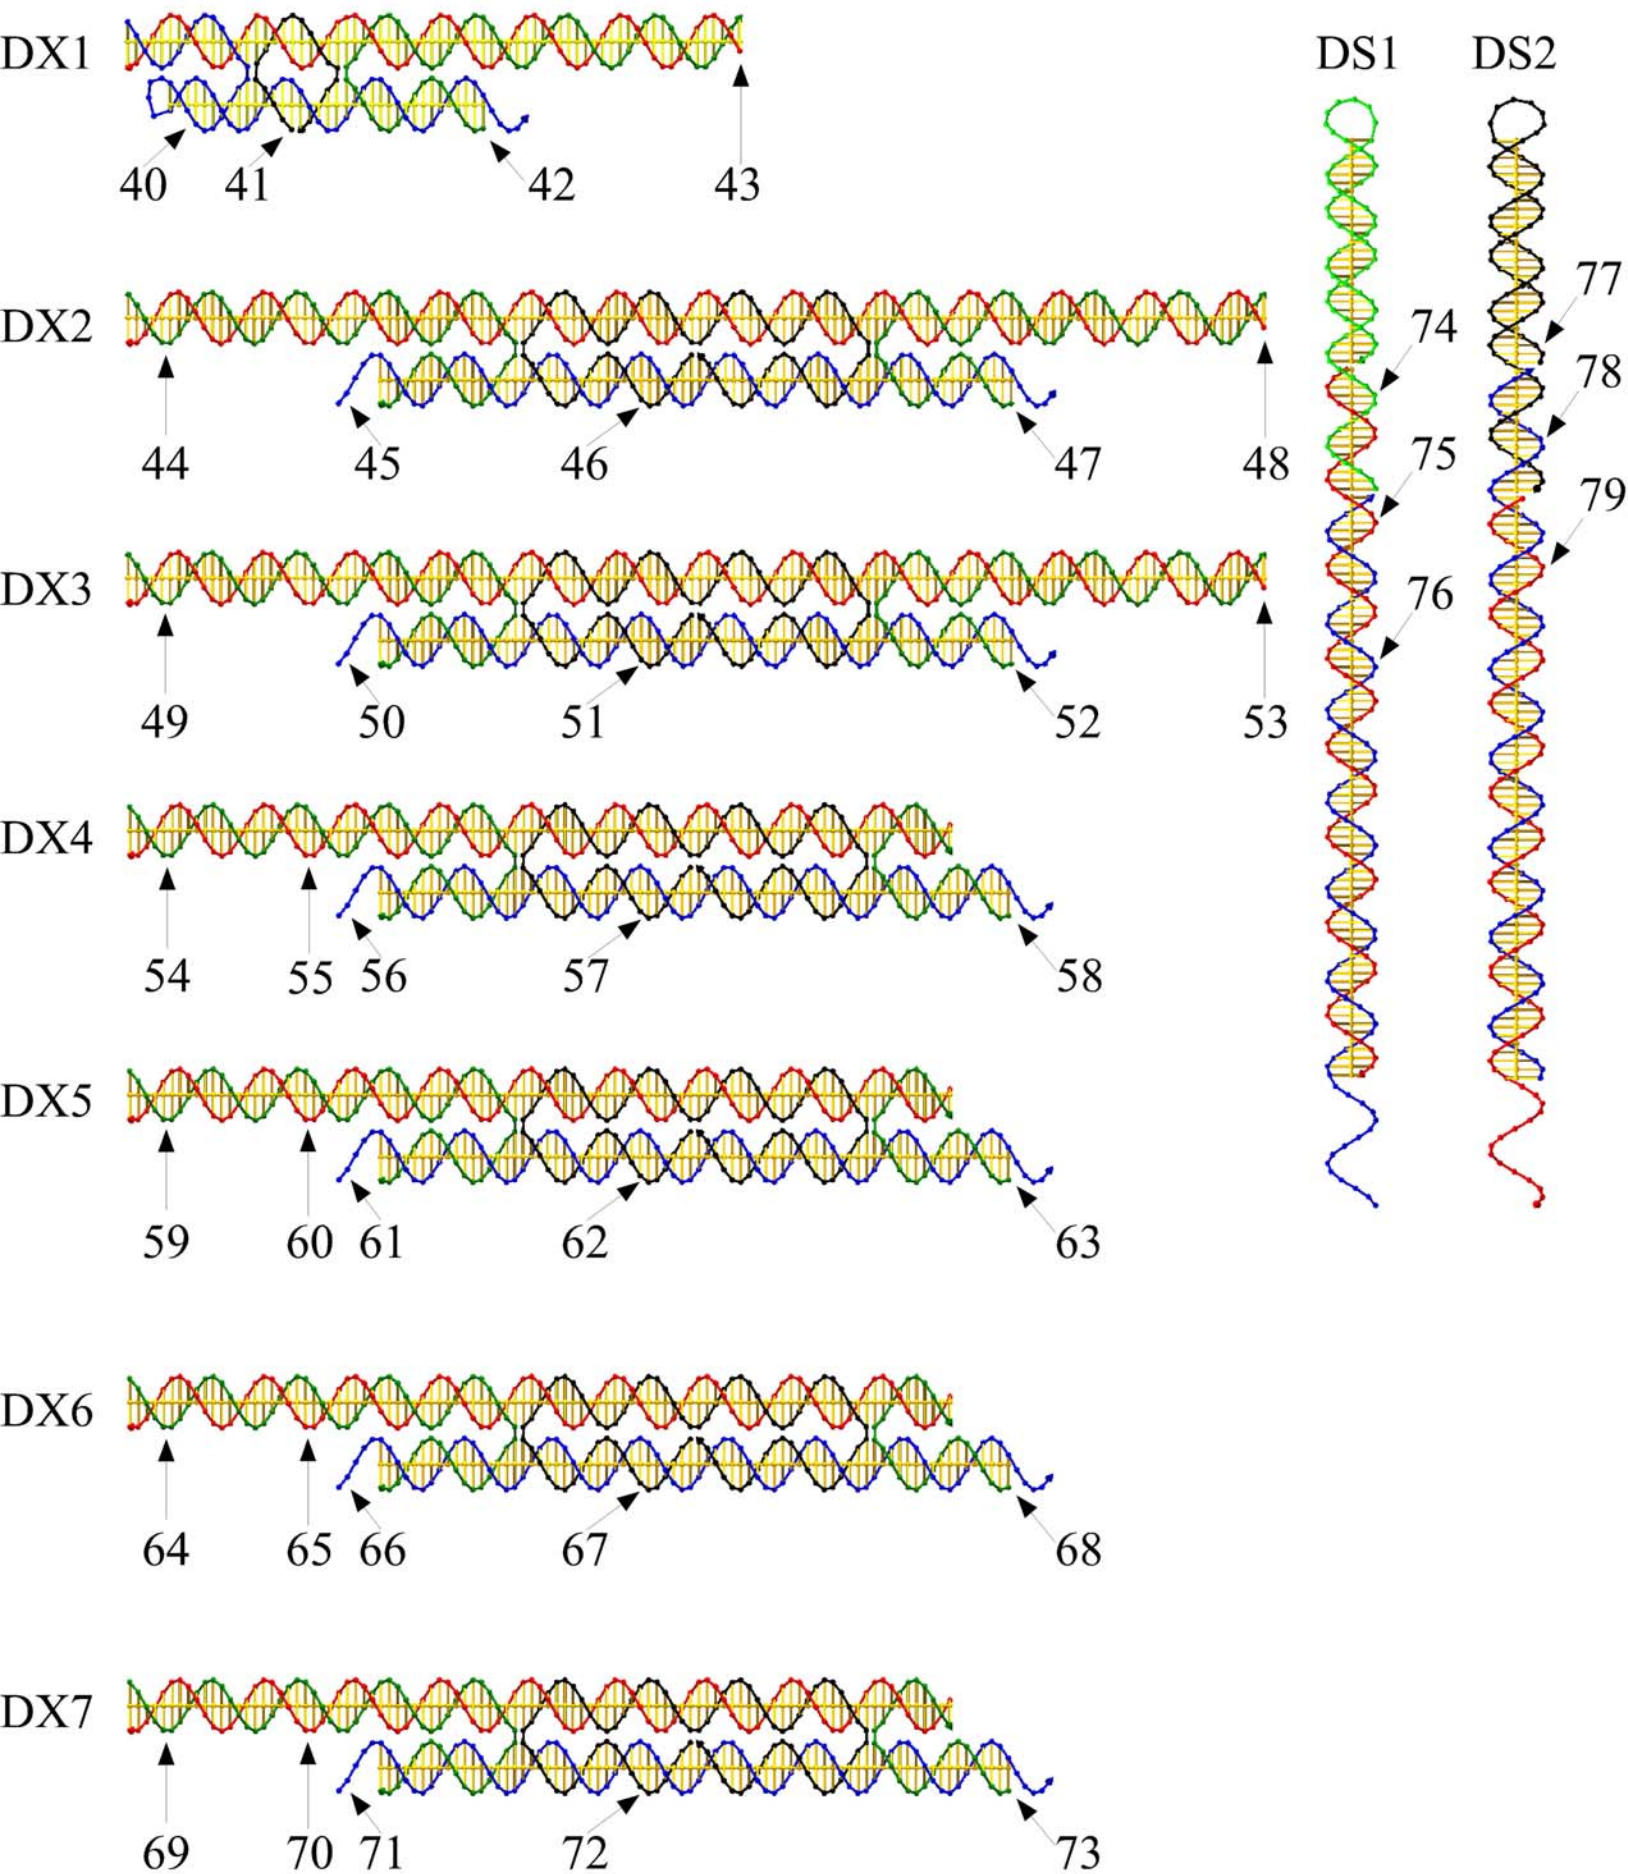

# Strand Numbering for Devices (in Both States)

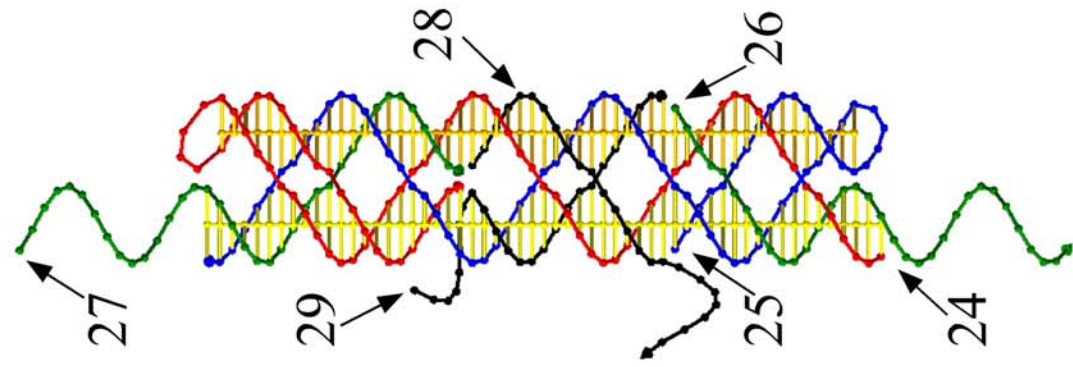

PX1

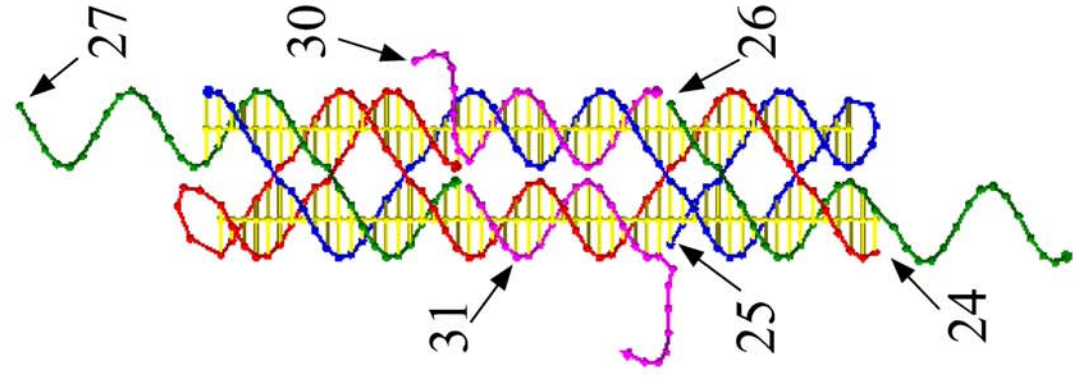

JX21

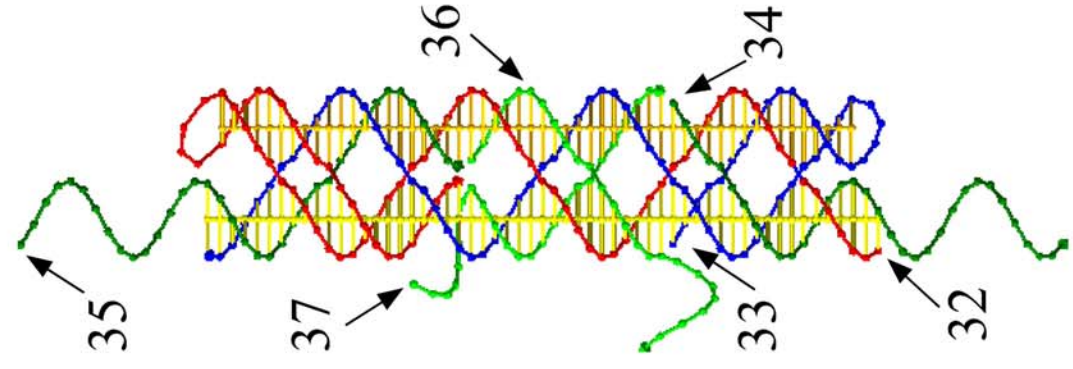

PX2

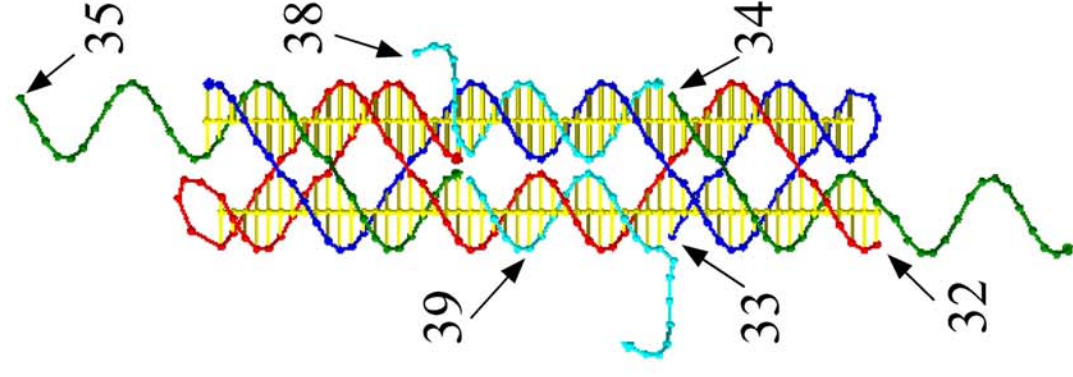

JX22

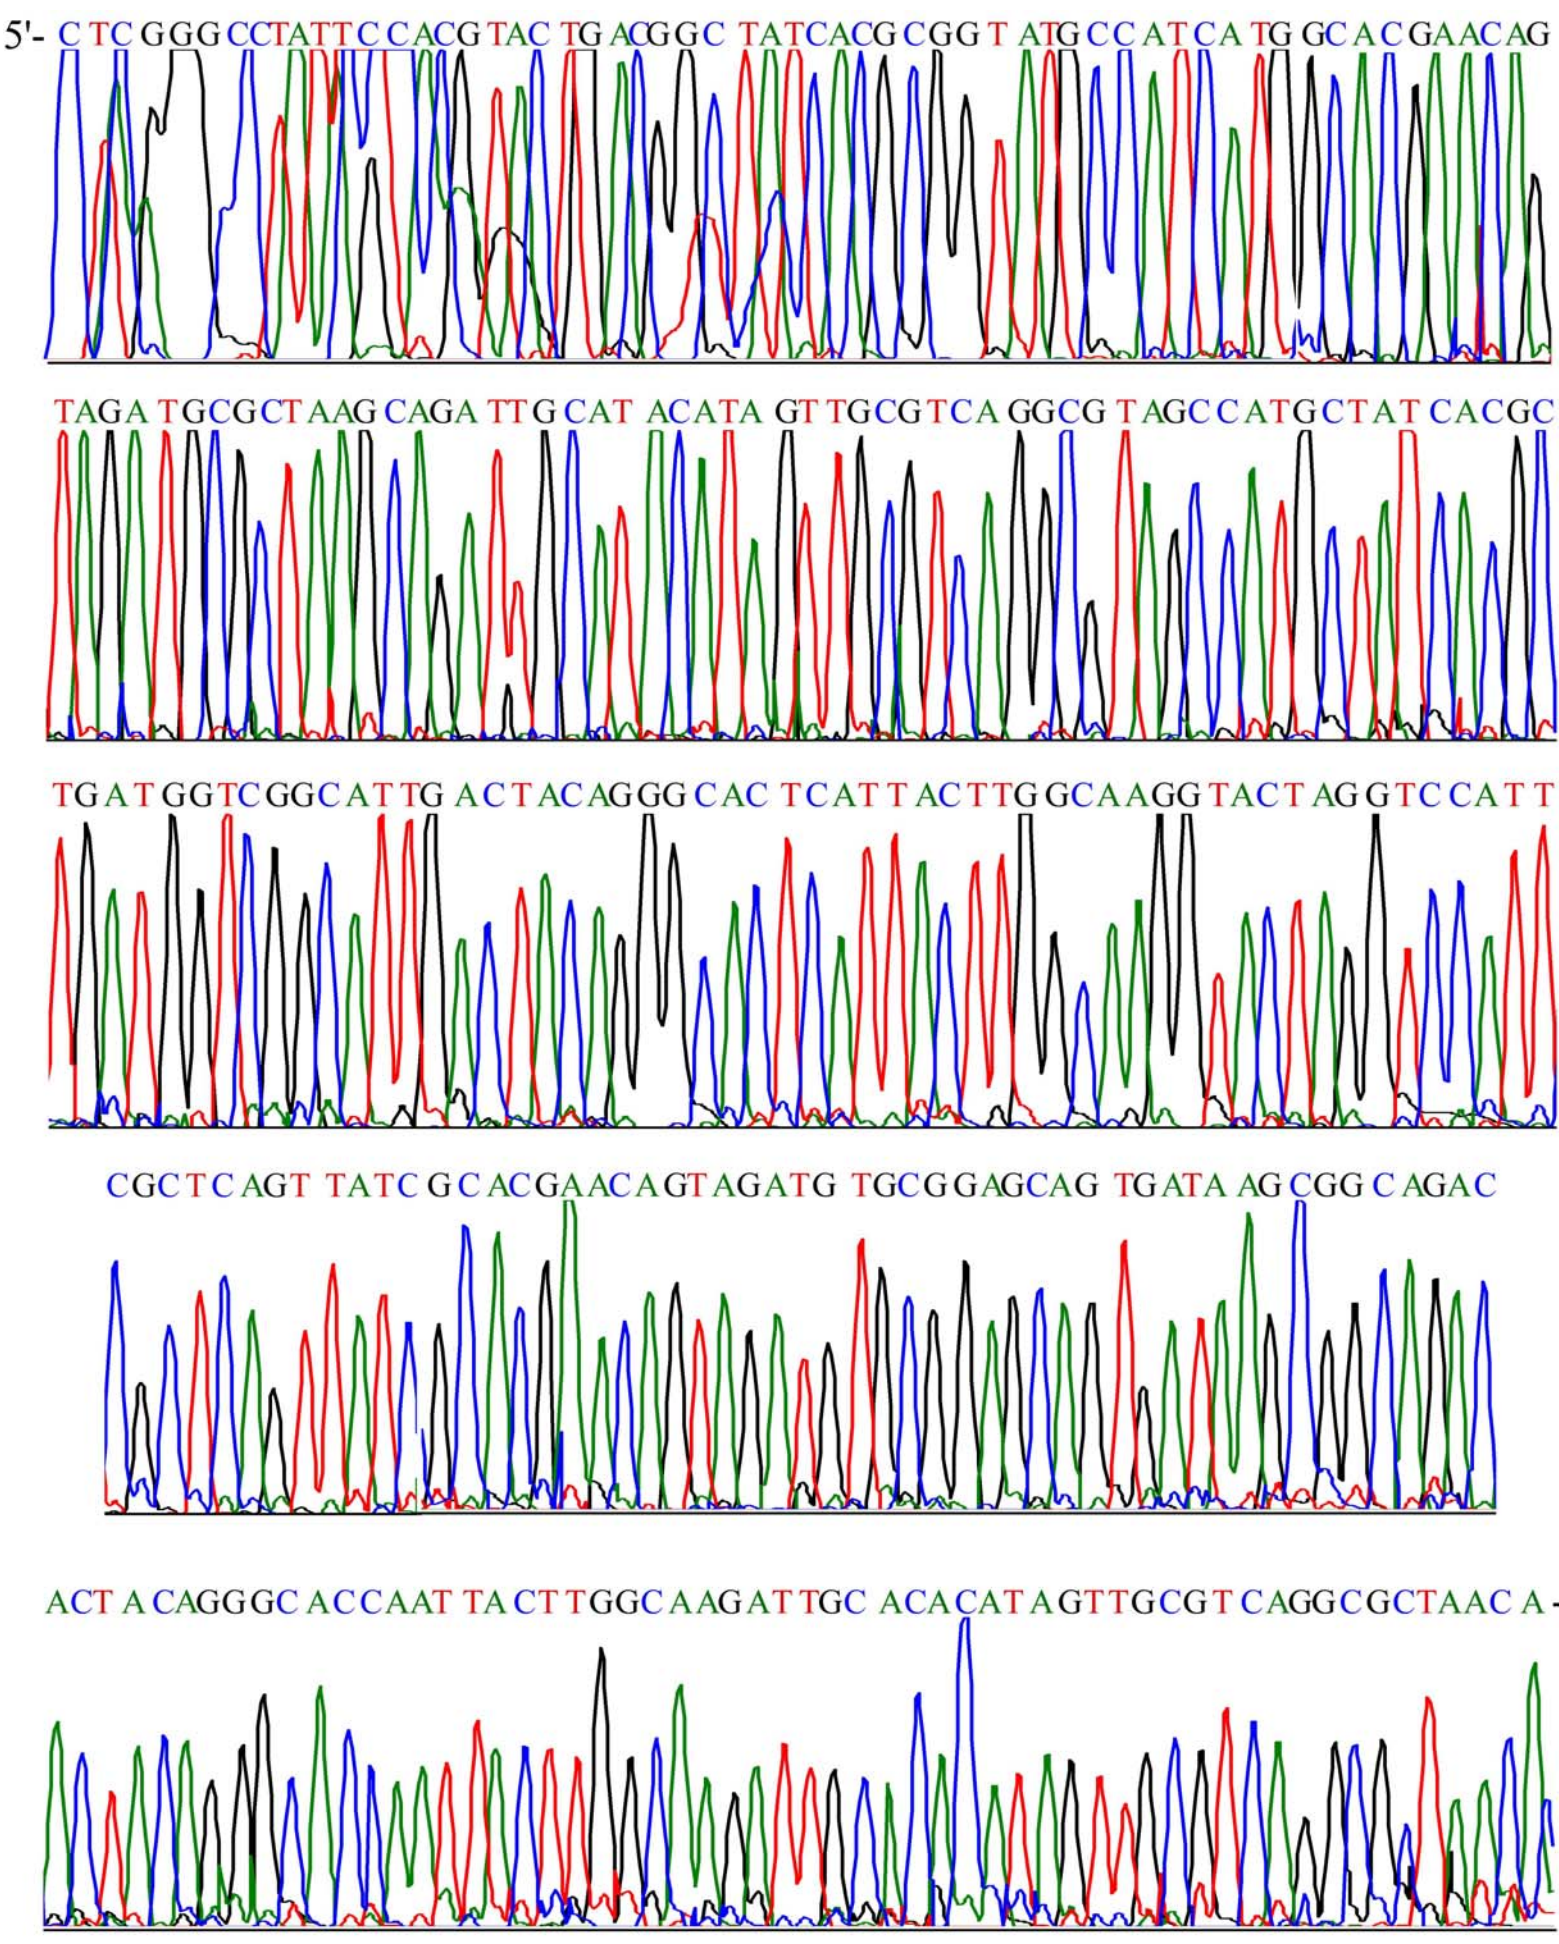

Sequencing result for the complementary strand of the PX-PX ligation product



5'-CTNGGGCCTATCCAN GG AC TGACTNC TATNACGCGG TATGCCATCA TGGCAGAACAG

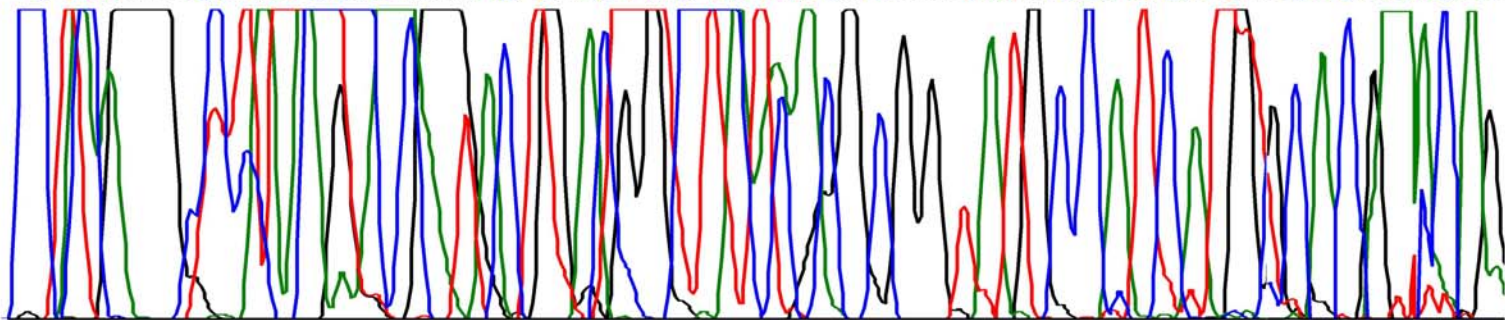

TAGATGCGCTAAG CAGA TTG CACACATA GT TGCGTCAGGCG TAGCCATGCTAT CATGCTG

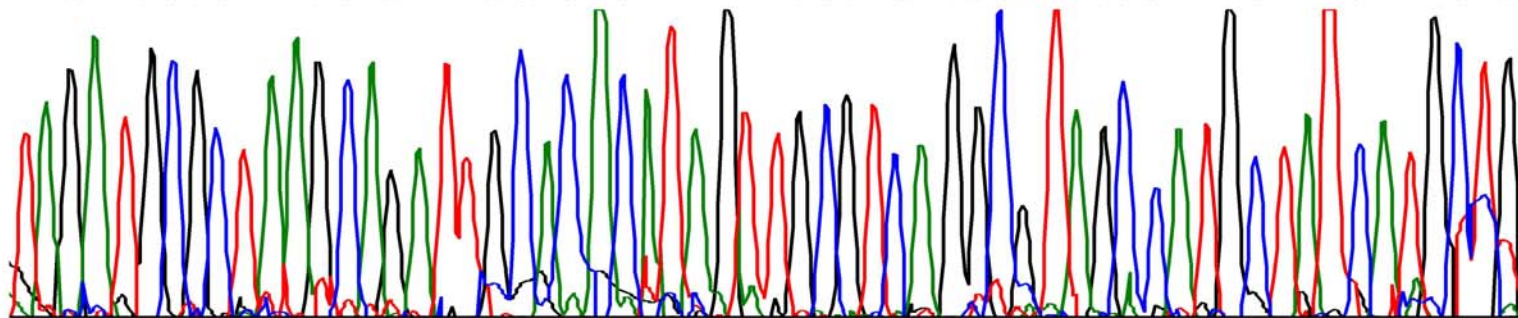

ATGGTCGGCATTGAC TACAGGGCAC TCATTACTTGGCAAGGT ACTAGGTC CATTCGCT

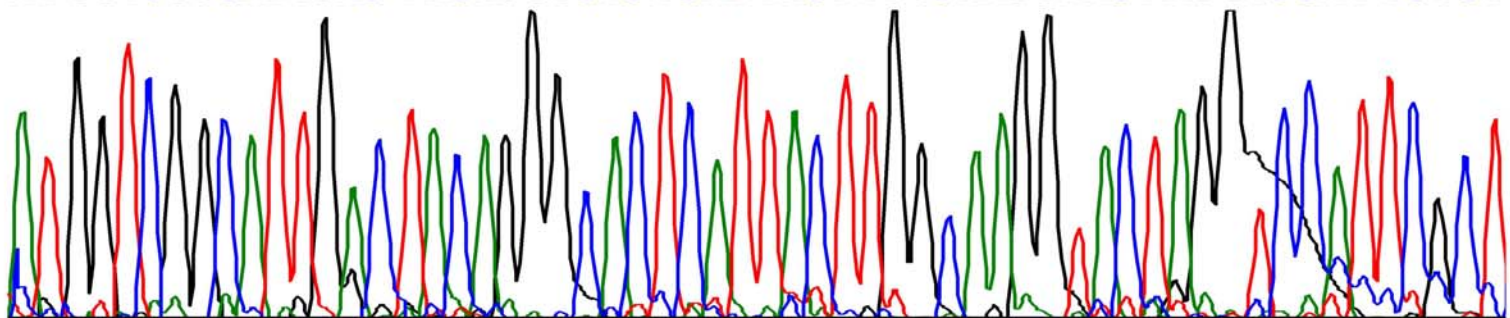

CAGTTATC G CACGA ACAGTAGATG CGCTAAGC A GATTGCACACA TAGTTGC

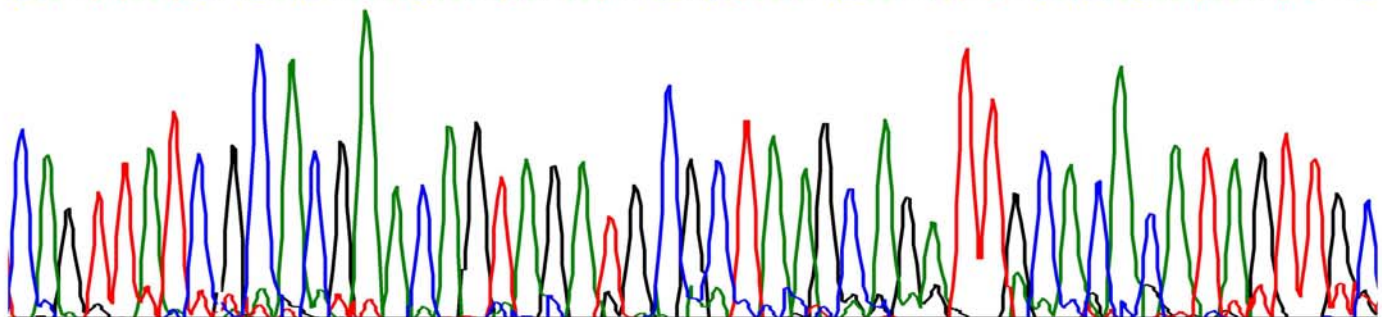

GTCAGGCG TAGCCATGCTATCATGCTGAGGCTCGGCA TTGACTACAGGGCACTGAT -3'

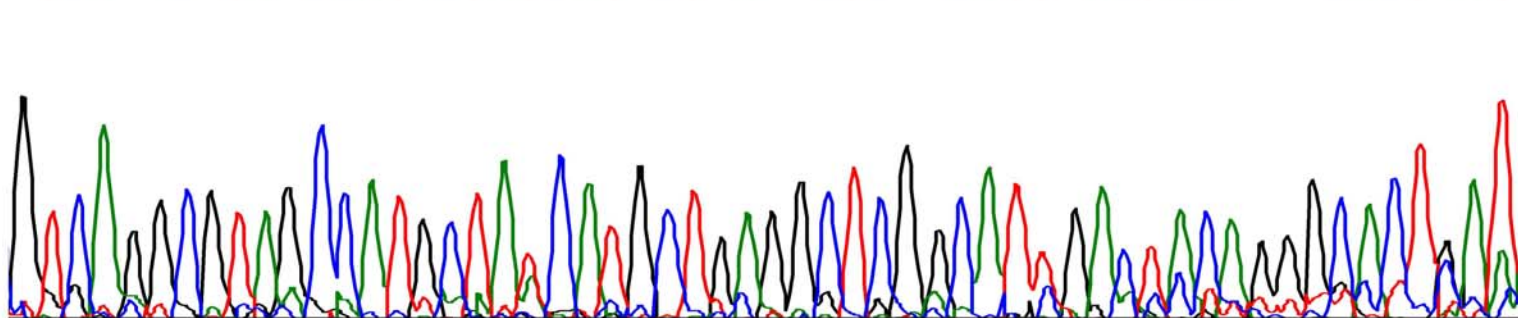

Sequencing result for the complementary strand of the PX-JX2 ligation product

5'-CTN GGG CCT NTCTCACGTAC TGACGGC TATCACGCGGT ATGCCATCA TG GCACGAACAG

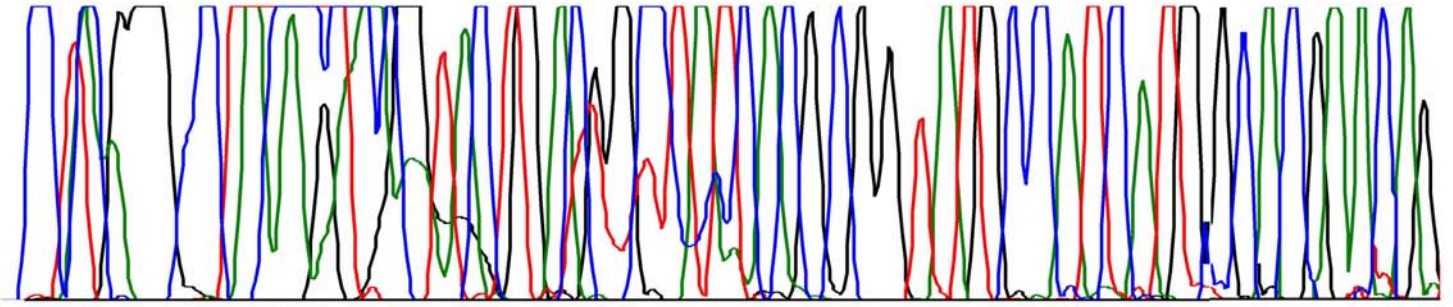

TAGATGCGCGGAGCA GTGA TGGTCGGCATTGACTACAGGGCACTCATT TCTTGGCAAGATTG

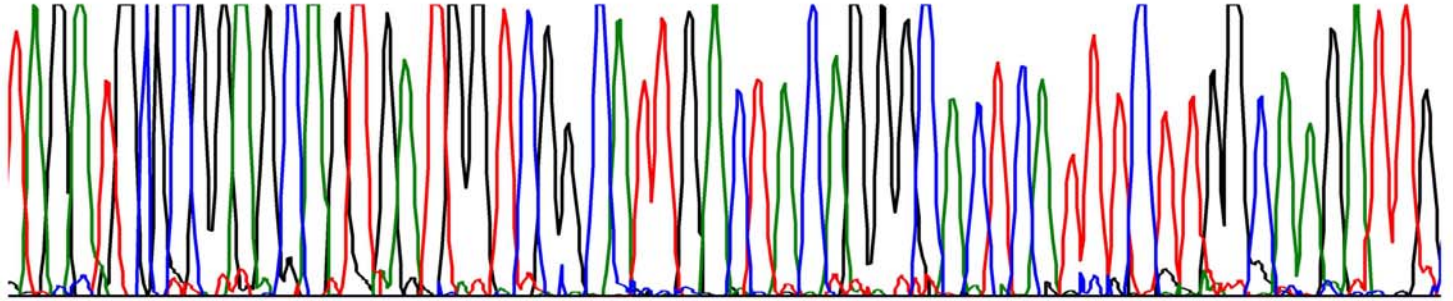

CACACA TAGTTGCG TCAGGCGTAGCCATG CTAT C GT TGGTA C TAGGTCCAT TCGCTC

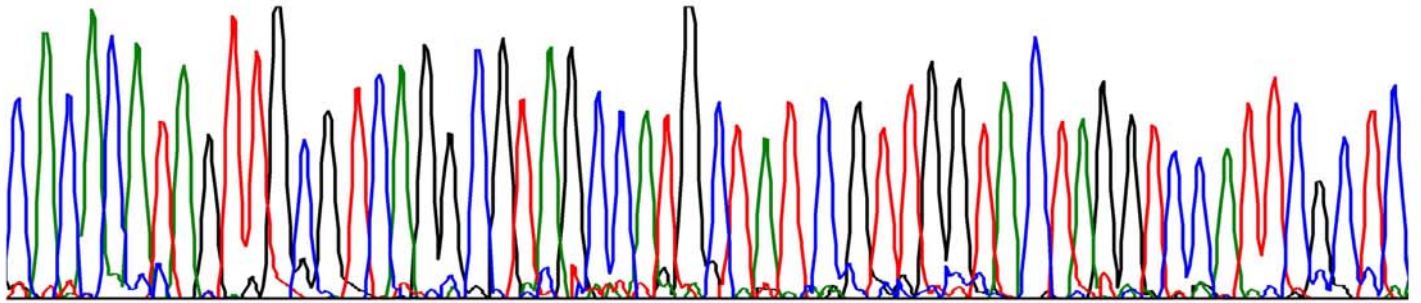

AGT TATCGC ACAA TGCGGGT GGAT AA TGTGA GTGATATGA CCA TAGTTGC

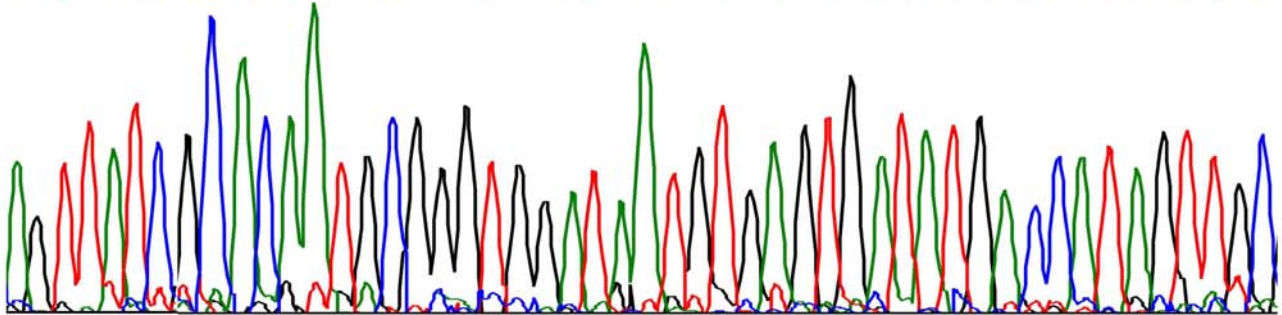

G TCAGGCGTAGCCATGCTATCGACC TCTGT TGGCAG TGG TACTACAGGGCACGCTC -3'

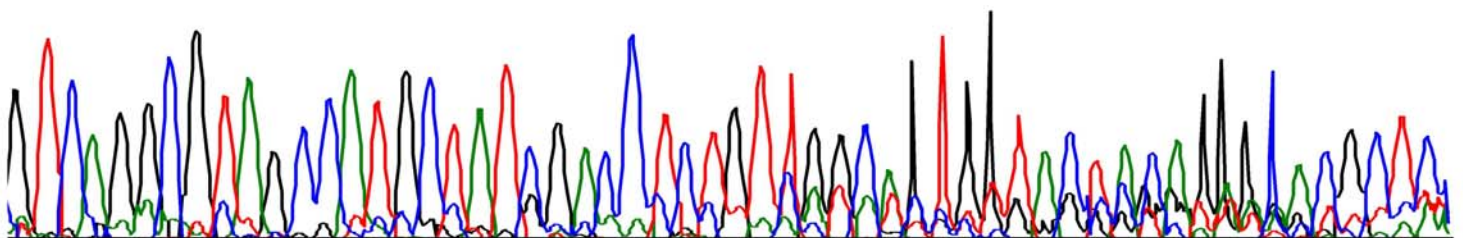

Sequencing result for the complementary strand of the JX2-PX ligation product

5'-CTCGGGTCTATTCACG TAC TGACGGC TATCACGCGGT ATGCCATCA TG GCACGAA

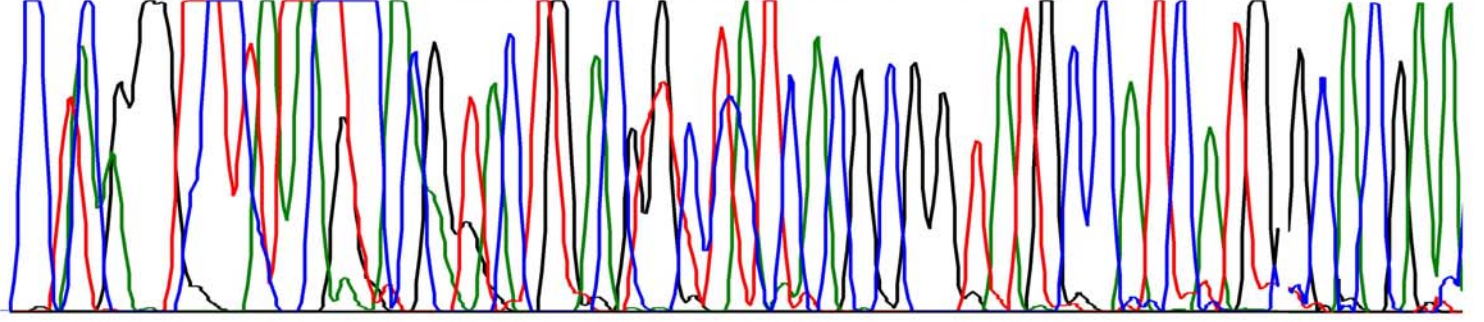

CAGTAGATGC GCGGAGCAG TGATGGTCGGCATTGACT GCAGGGCAC TCATTACTTGGCA

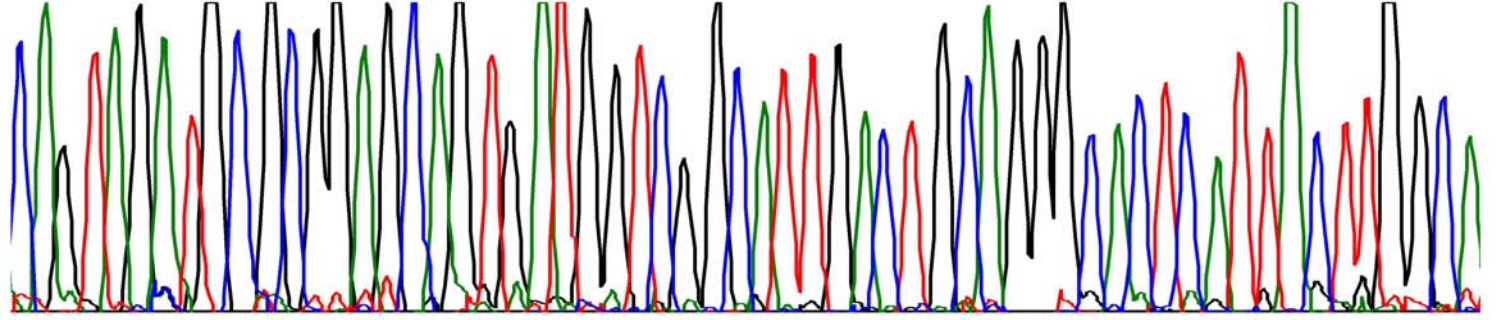

AGATTGCACACA TAGTTGCGTCAGGCGTAGCCATGCTATCGTTGGTAC TAGGTCCATT

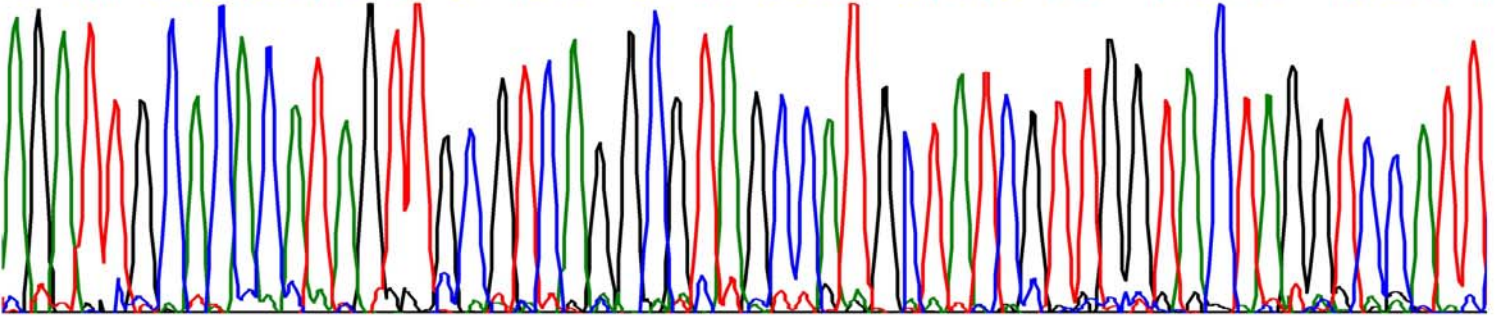

CGCTCAGTTATCGCACACATGAGCACGAT ATTAGCGCAGCGTGA GTCATAGTTGCG

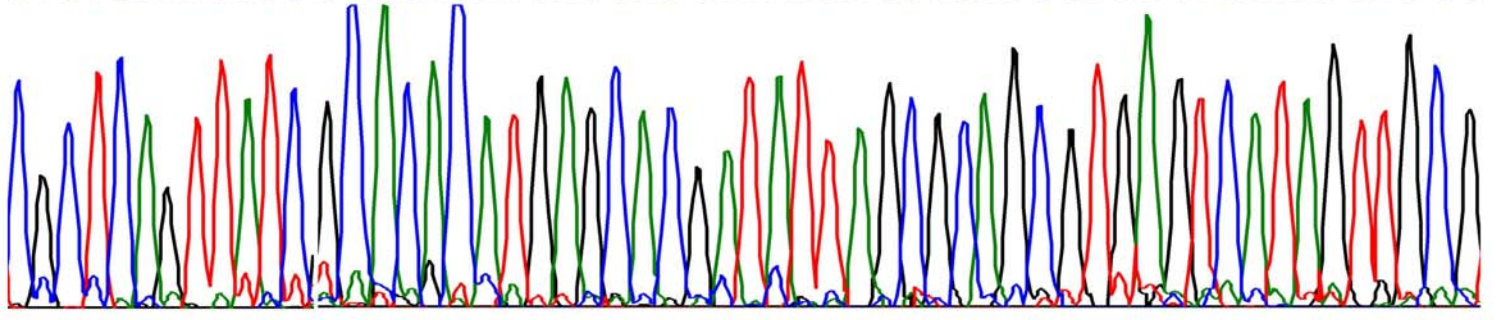

TCAGGCGTAGCCATGCGGTCAAGTATAGCAGTAGATTGCACTACAGGGTCGATT C-3'

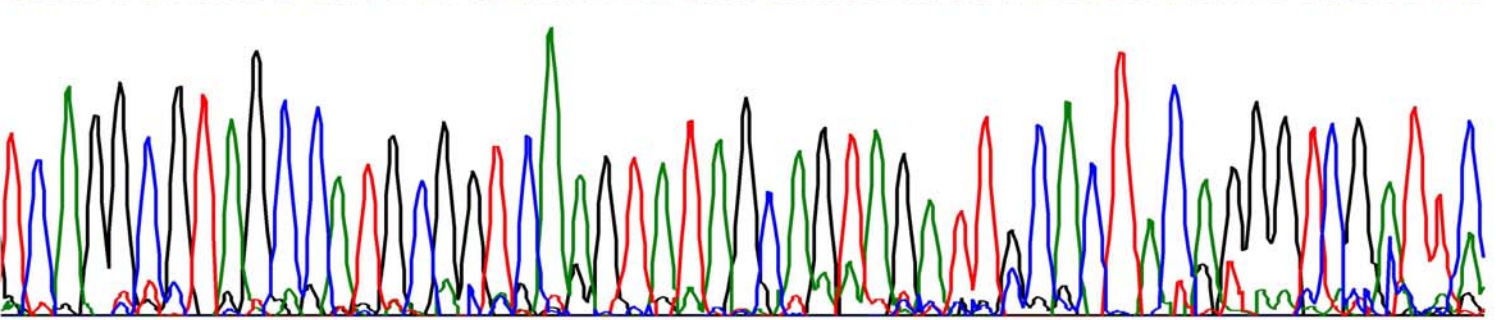

Sequencing result for the complementary strand of the JX2-JX2 ligation product.
